# Supplementary material for: Characteristics of pediatric SARS-CoV-2 infection and potential evidence for persistent fecal viral shedding
Source: Springer Nature journal article supplement (doi:10.1038/s41591-020-0817-4), 2020-03-13
Supplement: 41591_2020_817_MOESM1_ESM.pdf [file 41591_2020_817_MOESM1_ESM.pdf]

In the format provided by the authors and unedited.

# Characteristics of pediatric SARS-CoV-2 infection and potential evidence for persistent fecal viral shedding

Yi Xu<sup>1,11</sup>, Xufang Li<sup>1,11</sup>, Bing Zhu<sup>2,11</sup>, Huiying Liang<sup>3,4,11</sup>, Chunxiao Fang<sup>1</sup>, Yu Gong<sup>1</sup>, Qiaozhi Guo<sup>5</sup>, Xin Sun<sup>5</sup>, Danyang Zhao<sup>5</sup>, Jun Shen<sup>1</sup>, Huayan Zhang<sup>1,4,6</sup>, Hongsheng Liu<sup>7</sup>, Huimin Xia<sup>3,4,8</sup>✉, Jinling Tang<sup>3,4</sup>✉, Kang Zhang<sup>8,9,10</sup>✉ and Sitang Gong<sup>1,4</sup>✉

<sup>1</sup>Department of Pediatric, Guangzhou Women and Children's Medical Center, Guangzhou Medical University, Guangzhou, China. <sup>2</sup>Department of Center Laboratory, Guangzhou Women and Children's Medical Center, Guangzhou Medical University, Guangzhou, China. <sup>3</sup>Clinical Data Center, Guangzhou Women and Children's Medical Center, Guangzhou Medical University, Guangzhou, China. <sup>4</sup>Guangdong Provincial Children's Medical Research Center, Guangzhou Women and Children's Medical Center, Guangzhou Medical University, Guangzhou, China. <sup>5</sup>Department of Medical Administration, Guangzhou Women and Children's Medical Center, Guangzhou Medical University, Guangzhou, China. <sup>6</sup>Division of Neonatology and Department of Pediatrics, Children's Hospital of Philadelphia and University of Pennsylvania, Philadelphia, PA, USA. <sup>7</sup>Department of Radiology, Guangzhou Women and Children's Medical Center, Guangzhou Medical University, Guangzhou, China. <sup>8</sup>Guangdong Provincial Key Laboratory of Research in Structural Birth Defect Disease, Guangzhou Women and Children's Medical Center, Guangzhou Medical University, Guangzhou, China. <sup>9</sup>Guangzhou Regenerative Medicine and Health Guangdong Laboratory, Guangzhou, China. <sup>10</sup>Center for Biomedicine and Innovations, Faculty of Medicine, Macau University of Science and Technology, Macau, China. <sup>11</sup>These authors contributed equally: Yi Xu, Xufang Li, Bing Zhu, Huiying Liang. ✉ e-mail: [huiminxia@hotmail.com](mailto:huiminxia@hotmail.com); [jltang@cuhk.edu.hk](mailto:jltang@cuhk.edu.hk); [kang.zhang@gmail.com](mailto:kang.zhang@gmail.com); [sitangg@126.com](mailto:sitangg@126.com)

**Supplementary Table 1. Cytokine levels of n=10 independent pediatric patients confirmed with SARS CoV-2 infection at hospital admission**

| Characteristic                            | Case 1 | Case 2 | Case 3 | Case 4 | Case 5 | Case 6 | Case 7 | Case 8 | Case 9 | Case 10 |
|-------------------------------------------|--------|--------|--------|--------|--------|--------|--------|--------|--------|---------|
| IgG (g/L; normal range 5-10.6)            | 9.25   | 11.90  | 11     | 16.00  | 6.02   | 8.28   | 18.1   | 15.1   | 3.73   | NA      |
| IgA (g/L; normal range 0.34-1.38)         | 1.34   | 2.49   | 0.86   | 3.78   | 0.37   | 0.6    | 1.82   | 2.61   | 0.07   | NA      |
| IgM (g/L; normal range 0.44-1.44)         | 0.95   | 1.33   | 1.19   | 0.87   | 0.79   | 0.53   | 1.81   | 1.57   | 0.36   | NA      |
| C3 (g/L; normal range 0.8-1.5)            | 1.06   | 0.96   | 0.89   | 0.72   | 0.94   | 0.99   | 1.37   | 1.38   | 0.66   | NA      |
| C4 (g/L; normal range 0.13-0.43)          | 0.3    | 0.22   | 0.27   | 0.15   | 0.26   | 0.23   | 0.32   | 0.25   | 0.07   | NA      |
| IgE (g/L; normal range 0-100)             | 638    | 55     | 144    | 411    | 41     | 221    | 18     | 50     | 15     | NA      |
| TNF- $\beta$ (ng/L; normal range 0-3.49)  | 0.73   | 1.21   | 0.72   | 1.72   | 1.06   | 0.92   | 2.02   | 1.43   | 1.91   | NA      |
| IL-12p70 (ng/L; normal range 0-6.9)       | 6.12   | 7.06   | 2.76   | 5.90   | 5.31   | 3.01   | 2.94   | 2.83   | 3.54   | NA      |
| IL-1 $\beta$ (ng/L; normal range 0-3.12)  | 0.67   | 0.90   | 0.15   | 2.69   | 0.39   | 0.63   | 0.01   | 1.95   | 0.01   | NA      |
| IL-10 (ng/L; normal range 0-8.14)         | 3.9    | 4.10   | 2.99   | 6.78   | 13.31  | 4.2    | 2.57   | 2.90   | 4.57   | NA      |
| IL-6 (ng/L; normal range 0-8.88)          | 8.62   | 14.25  | 60.09  | 14.40  | 8.47   | 8.93   | 4.46   | 16.58  | 2.23   | NA      |
| TNF- $\alpha$ (ng/L; normal range 0-5.35) | 4.34   | 5.26   | 2.99   | 9.04   | 13.90  | 4.34   | 3.46   | 4.29   | 3.76   | NA      |
| IL-2 (ng/L; normal range 0-5.03)          | 8.73   | 6.19   | 4.85   | 10.49  | 72.91  | 6.28   | 1.59   | 2.39   | 3.73   | NA      |
| IFN- $\gamma$ (ng/L; normal range 0-6.56) | 4.09   | 4.82   | 2.72   | 6.65   | 11.82  | 2.8    | 2.82   | 5.56   | 5.76   | NA      |
| IL-17F (ng/L; normal range 0-4.66)        | 6.42   | 7.29   | 4.91   | 11.95  | 8.90   | 4.73   | 3.39   | 5.28   | 4.32   | NA      |
| IL-8 (ng/L; normal range 0-15.71)         | 4.42   | 3.96   | 12.21  | 9.00   | 6.20   | 21.29  | 4.67   | 3.68   | 5.18   | NA      |
| IL-4 (ng/L; normal range 0-4.62)          | 2.08   | 1.58   | 1.58   | 5.72   | 3.41   | 1.83   | 1.62   | 2.50   | 1.83   | NA      |
| IL-5 (ng/L; normal range 0-3.73)          | 1.38   | 1.03   | 0.49   | 2.36   | 0.99   | 1.17   | 1.31   | 2.19   | 1.40   | NA      |
| IL-17A (ng/L; normal range 0-3.71)        | 3.31   | 3.12   | 2.22   | 3.96   | 2.86   | 2.79   | 2.37   | 2.87   | 3.96   | NA      |
| IL-22 (ng/L; normal range 0-2.61)         | 1.78   | 5.81   | 10.22  | 9.71   | 4.86   | 2.11   | 0.75   | 3.98   | 2.18   | NA      |

IL= Interleukin
